# Supplementary material for: Machine-learning prediction of metal sulfide photocatalysts for sacrificial hydrogen evolution under visible light irradiation
Source: Royal Society of Chemistry journal article supplement (doi:10.1039/d5ta06041a), 2026-01-01
Supplement: d5ta06041a3.pdf [file d5ta06041a3.pdf]

## Supplementary Information

### Machine-Learning Prediction of Metal Sulfide Photocatalysts for Sacrificial Hydrogen Evolution under Visible Light Irradiation

Yuichi Yamaguchi,<sup>a,b</sup> Fuga Kakami,<sup>a</sup> Ryuto Baba,<sup>c</sup> Wataru Takahara,<sup>c</sup> Yosuke  
Harashima,<sup>c,d</sup> Tomoaki Takayama,<sup>c,d</sup> Mikiya Fujii,<sup>\*c,d,e</sup> Akihiko Kudo<sup>\*a,b</sup>

\*Corresponding authors

<sup>a</sup>Department of Applied Chemistry, Faculty of Science, Tokyo University of Science, 1-  
3 Kagurazaka, Shinjuku-ku, Tokyo 162-8601, Japan

<sup>b</sup>Carbon Value Research Center, Research Institute for Science and Technology, Tokyo  
University of Science, 2641 Yamazaki, Noda-shi, Chiba-ken 278-8510, Japan

<sup>c</sup>Graduate School of Science and Technology, Nara Institute of Science and Technology,  
Ikoma-shi, Nara 630-0192, Japan

<sup>d</sup>Data Science Center, Nara Institute of Science and Technology, Ikoma-shi, Nara 630-  
0192, Japan

<sup>e</sup>Center for Material Research Platform, Nara Institute of Science and Technology,  
Ikoma-shi, Nara 630-0192, Japan

**Table S1** Conditions of convergence criteria for geometric optimization

| Self-consistent field tolerance / eV atom <sup>-1</sup> | Energy tolerance / eV atom <sup>-1</sup> | Maximum force tolerance / eV Å <sup>-1</sup> | Displacement tolerance / Å | Max stress / GPa |
|---------------------------------------------------------|------------------------------------------|----------------------------------------------|----------------------------|------------------|
| 1.0×10 <sup>-6</sup>                                    | 1.0×10 <sup>-5</sup>                     | 0.03                                         | 1×10 <sup>-3</sup>         | 0.1              |

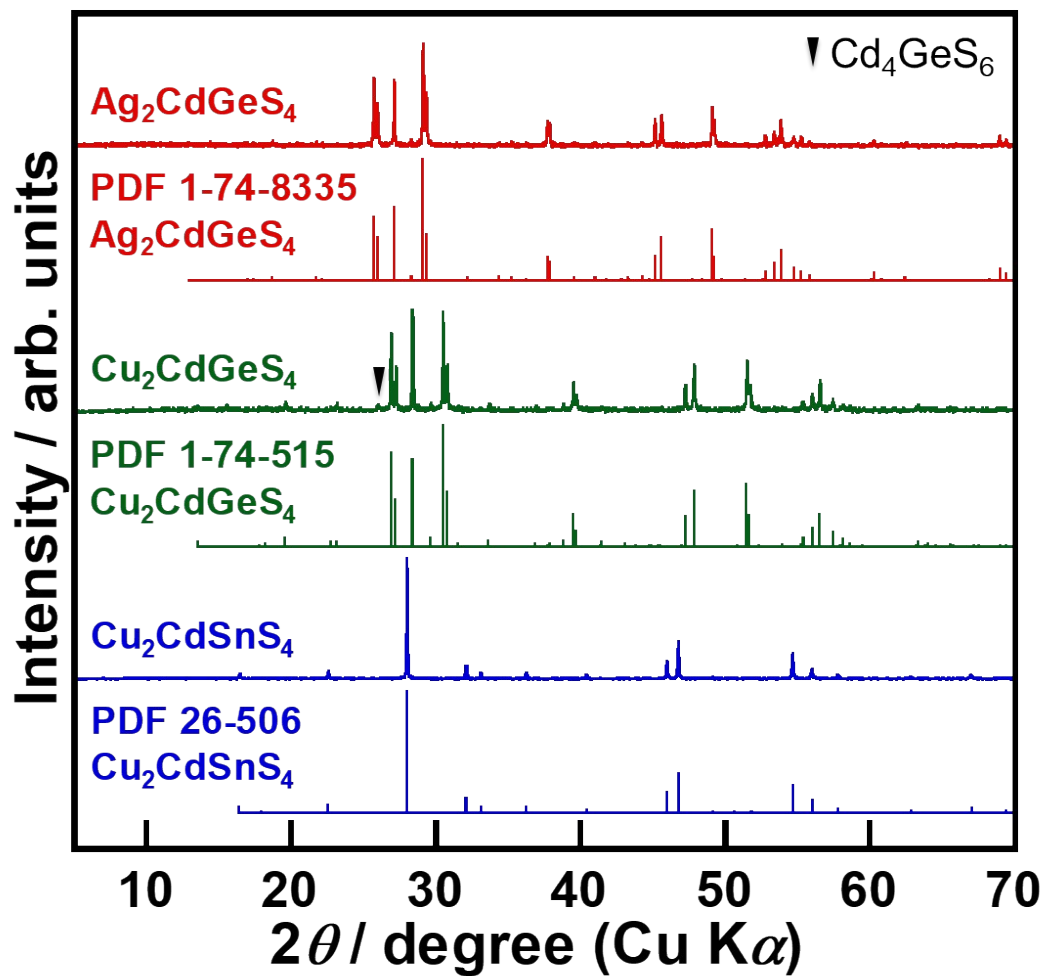

**Figure S1** XRD patterns of  $\text{Ag}_2\text{CdGeS}_4$  and  $\text{Cu}_2\text{CdMS}_4$  (M=Ge and Sn) prepared by a solid-state reaction. Patterns due to  $\text{K}\alpha_2$  were eliminated.

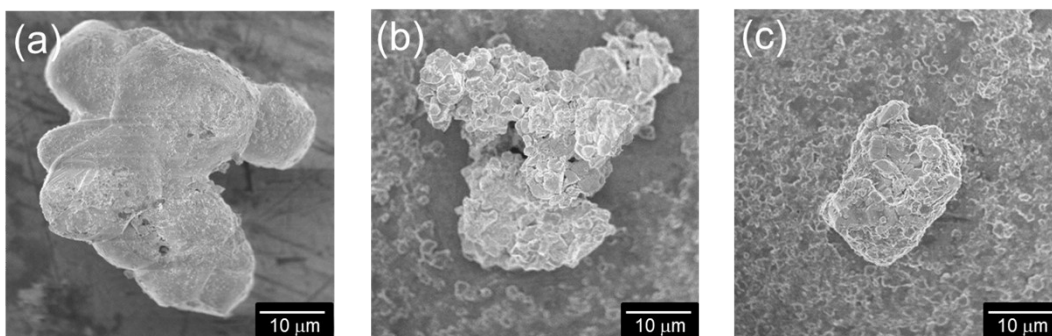

**Figure S2** SEM images of (a)  $\text{Ag}_2\text{CdGeS}_4$ , (b)  $\text{Cu}_2\text{CdGeS}_4$  and (c)  $\text{Cu}_2\text{CdSnS}_4$  prepared by a solid-state reaction.

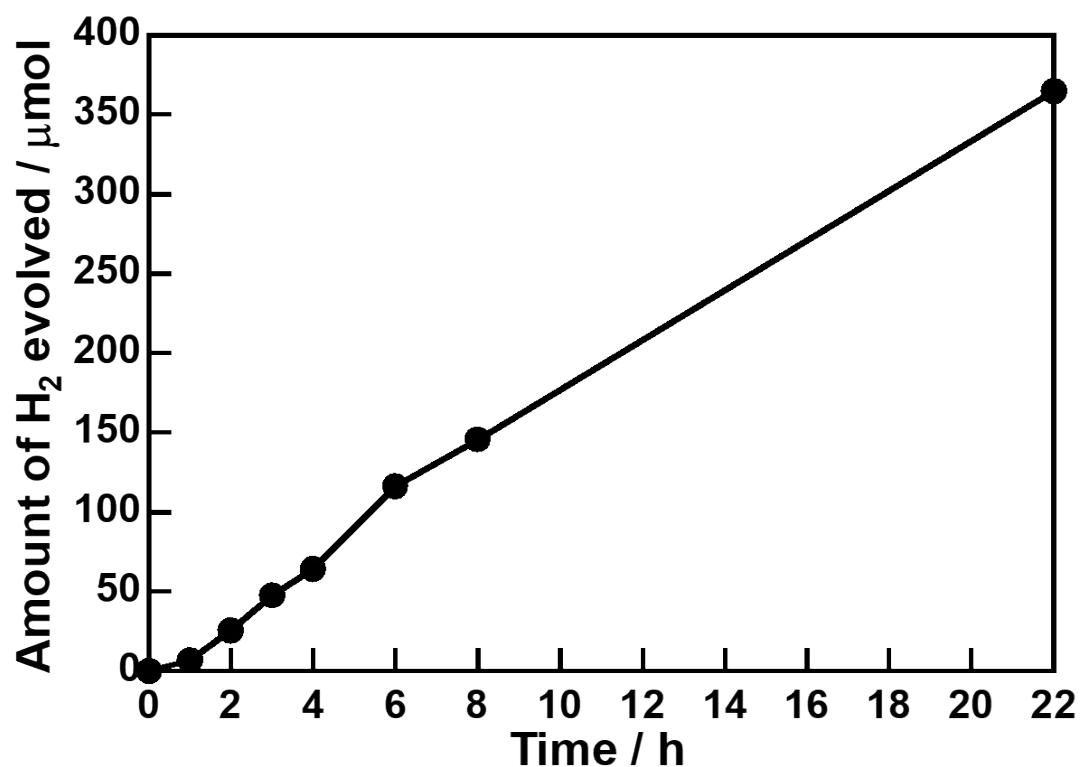

Figure S3 H<sub>2</sub> evolution over a Ru-loaded Cu<sub>2</sub>CdSnS<sub>4</sub> photocatalyst prepared by a solid-state reaction from an aqueous solution containing sacrificial reagents under visible light irradiation. Photocatalyst: 0.3 g, cocatalyst: photodeposition in situ, reactant solution: 0.5 mol L<sup>-1</sup> K<sub>2</sub>SO<sub>3</sub> and 0.1 mol L<sup>-1</sup> Na<sub>2</sub>S aqueous solution (120 mL), cell: top-irradiation cell with a Pyrex window, light source: 300 W Xe lamp with a cut-off filter (HOYA: L42).
